# Supplementary material for: Bioengineering Silicon Quantum Dot Theranostics using a Network Analysis of Metabolomic and Proteomic Data in Cardiac Ischemia
Source: PubMed Central journal article supplement — Theranostics. 2013 Sep 4;3(9):719–28. doi: 10.7150/thno.5010 (PMC3767118; doi:10.7150/thno.5010), 2013-09-04
Supplement: thnov03p0719s1.pdf [file thnov03p0719s1.pdf]

SUPPORTING INFORMATION:

**Bioengineering Silicon Quantum Dot Theranostics using a Network Analysis of Metabolomic and Proteomic Data in Cardiac Ischaemia**

*Translating Biomarkers to Theranostics*

<sup>1</sup>Folarin Erogbogbo, <sup>1</sup>Jasmine May, <sup>1</sup>Mark Swihart, <sup>1</sup>Paras N. Prasad, <sup>2</sup>Katie Smart, <sup>3</sup>Seif El Jack, <sup>4</sup>Dariusz Korcyk, <sup>5</sup>Mark Webster, <sup>5</sup>Ralph Stewart, <sup>6</sup>Irene Zeng, <sup>7</sup>Mia Jullig, <sup>8</sup>Katherine Bakeev, <sup>9</sup>Michelle Jamieson, <sup>9</sup>Nikolas Kasabov, <sup>10</sup>Banu Gopalan, <sup>9</sup>Linda Liang, <sup>9</sup>Raphael Hu, <sup>9</sup>Stefan Schliebs, <sup>7</sup>Silas Villas-Boas, <sup>3</sup>Patrick Gladding

<sup>1</sup>University at Buffalo, New York

<sup>2</sup>Lanzatech, Auckland

<sup>3</sup>North Shore Hospital, Auckland

<sup>4</sup>Princess Alexandra hospital, Brisbane

<sup>5</sup>Green Lane Cardiovascular Service, Auckland

<sup>6</sup>CCRep, Middlemore hospital, Auckland

<sup>7</sup>School of Biological Science, Auckland

<sup>8</sup>CAMO Software, New Jersey

<sup>9</sup>KEDRI, Auckland University of Technology

<sup>10</sup>Lerner Research Institute, Cleveland

Corresponding Author:

Patrick Gladding,

Address: Northshore Hospital

Waitemata DHB

Email: [patrickg@theranosticslab.com](mailto:patrickg@theranosticslab.com)

**Table S1. Potential biomarkers: common five metabolites identified by bioinformatic analysis of aortic blood and cross-referenced with coronary sinus data**

**Metabolite**

Methyl-2-oxopentanoicacid

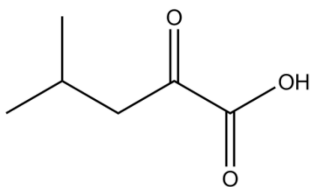

Serine

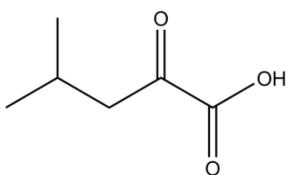

Tryptophan

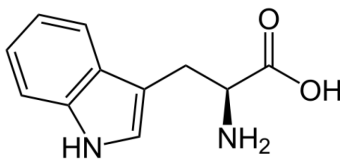

Oleic acid

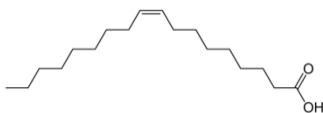

\*Myristic acid

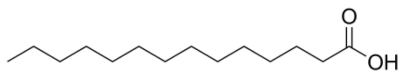

**Table S2 Differences between silica and silicon nanostructures**

|                                                                                      |                                                                                        |
|--------------------------------------------------------------------------------------|----------------------------------------------------------------------------------------|
| Silica in nanostructures                                                             | Silicon nanocrystals                                                                   |
| Formula – SiO <sub>2</sub>                                                           | Formula - Si                                                                           |
| Used to encapsulate active materials e.g gold                                        | Used as Active Material e.g. optical imaging                                           |
| Amorphous                                                                            | Crystalline                                                                            |
| Non-Luminescent                                                                      | Luminescent                                                                            |
| Well studied                                                                         | New and novel material                                                                 |
| Generally used as a Controllable Coating                                             | Never used as coating                                                                  |
| Never used for size controlled emission                                              | Used for sized tunable emission                                                        |
| Not the main focus of studies (other materials, such as gold, quantum dots, drugs, ) | The main focus of its' studies ( how can it be used for imaging, how does it interact) |

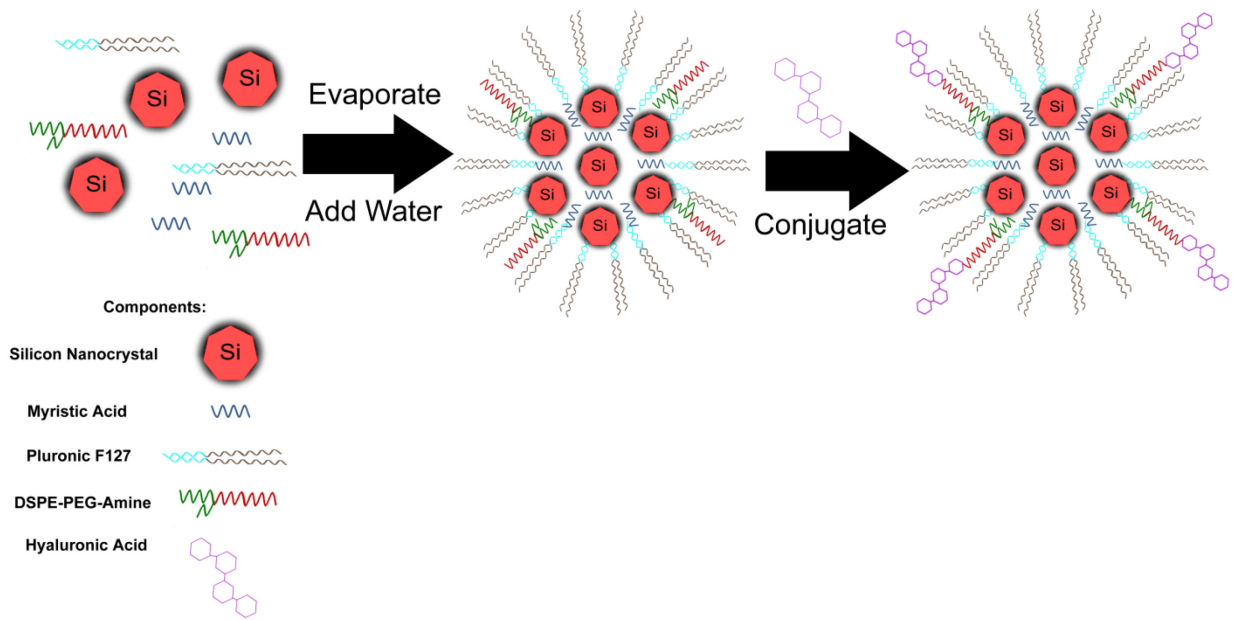

Figure S1. Depiction of an encapsulation process for silicon and myristic acid.

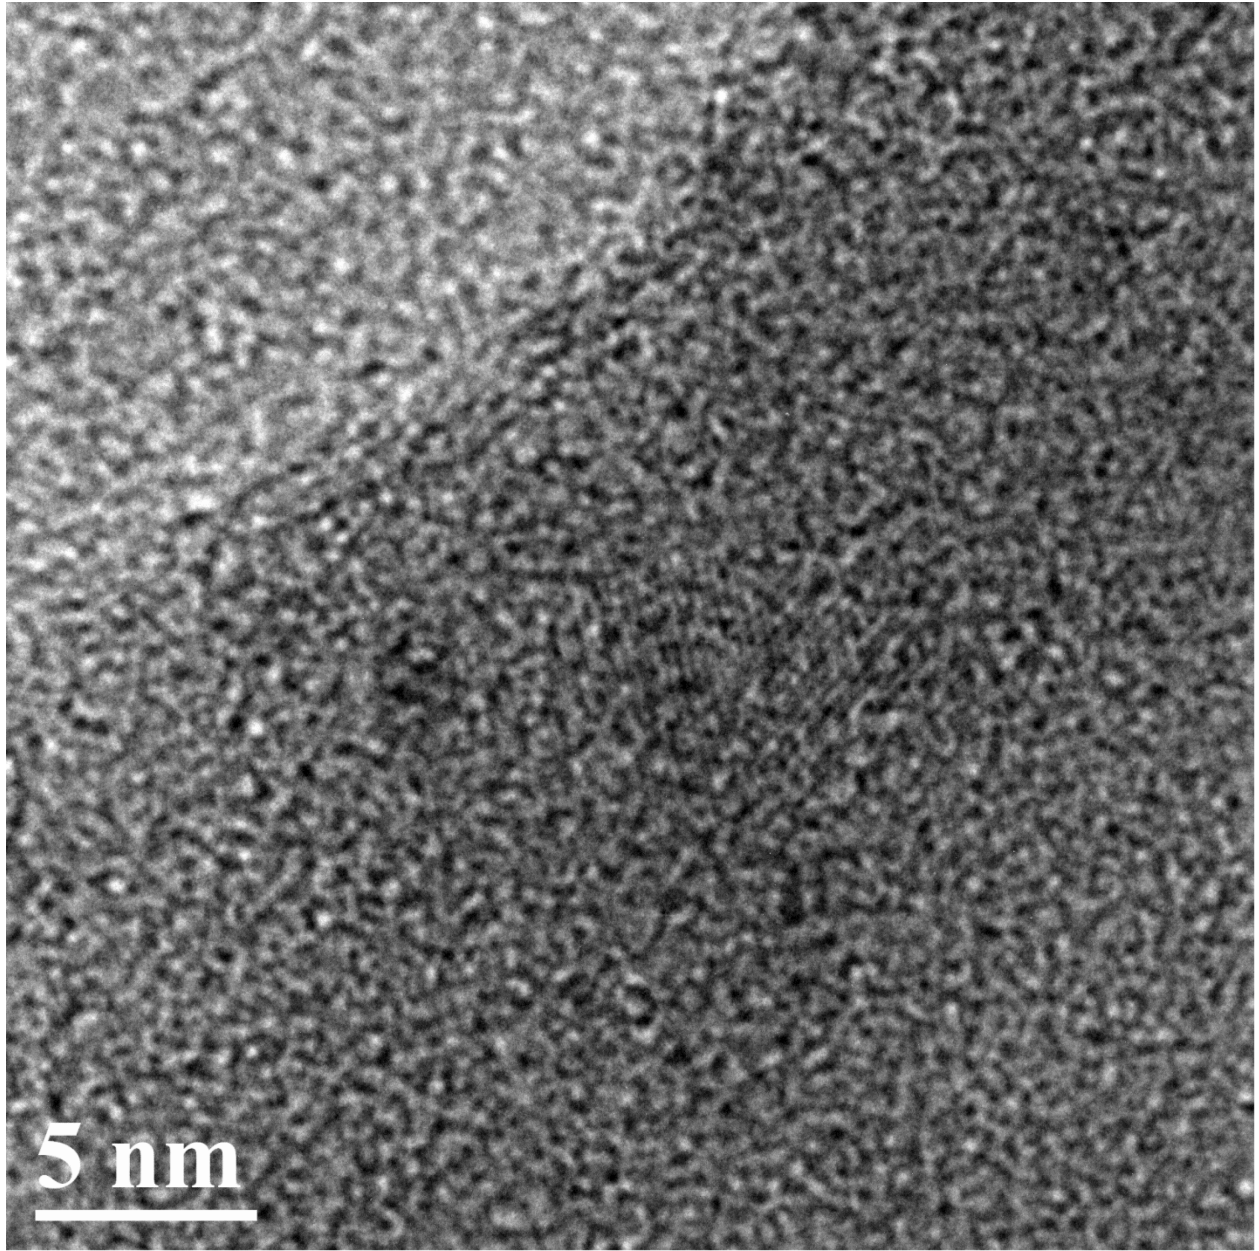

Figure S2. Larger image of TEM in Figure 5c.

Characterization data from components related to the nanostructure are depicted below.

# F127

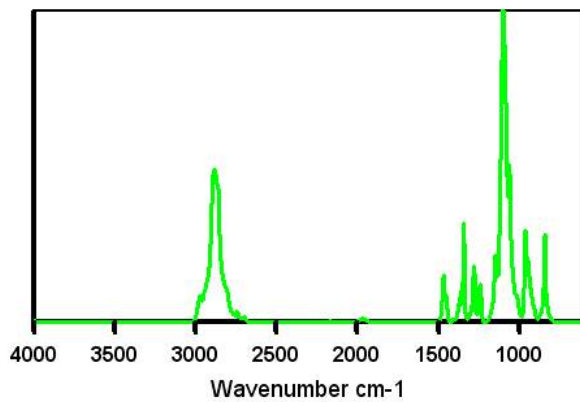

# Dspe/peg/amine

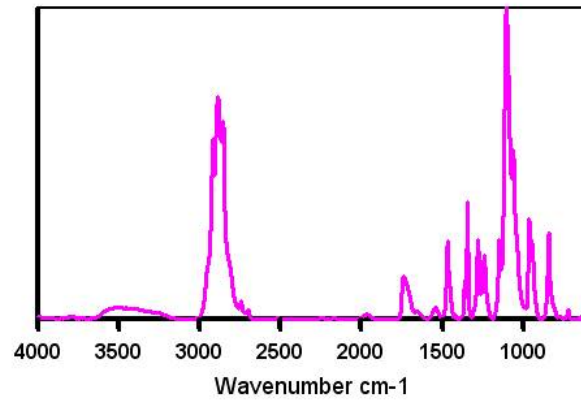

# Msi(f127+Dspepegamine)

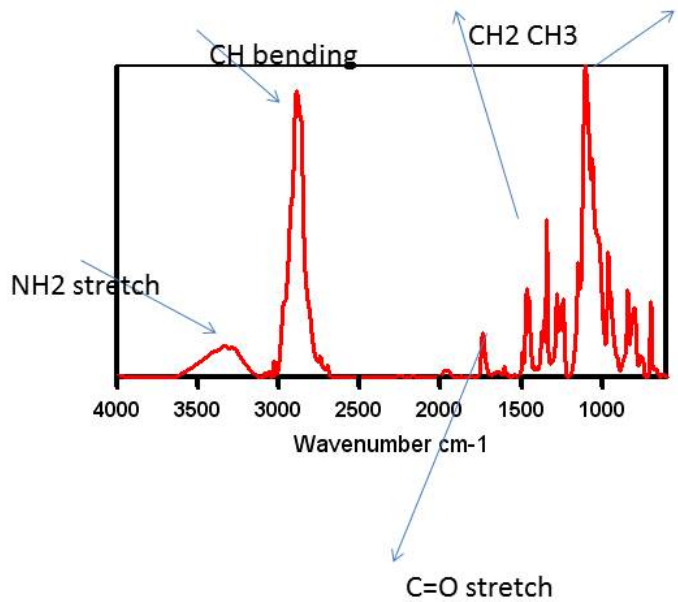



# Hyaluronic Acid Sodium salt

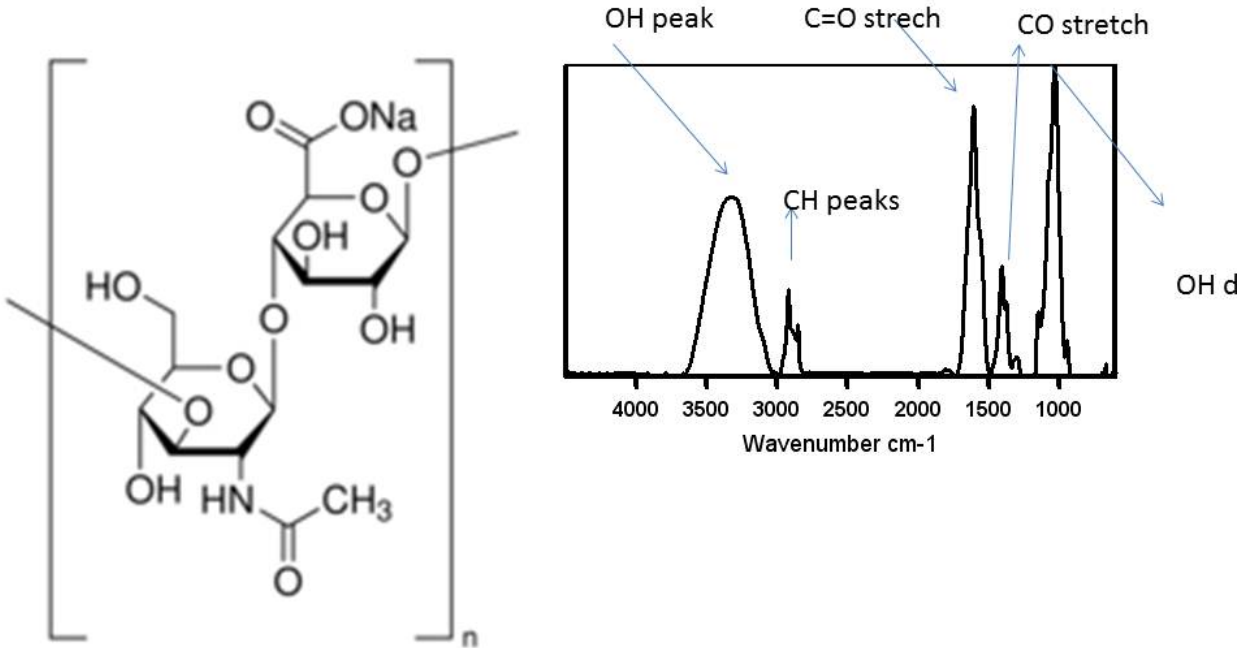

# Hyaluronic Acid conjugated Si

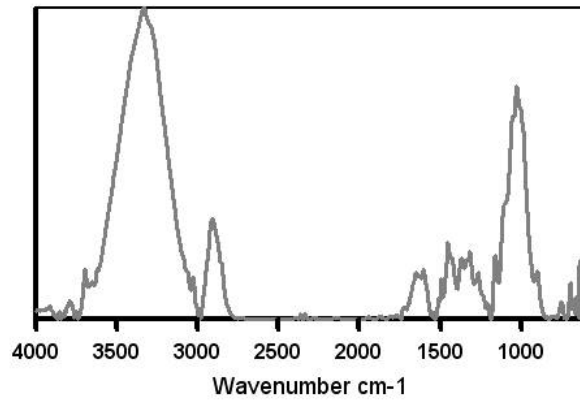

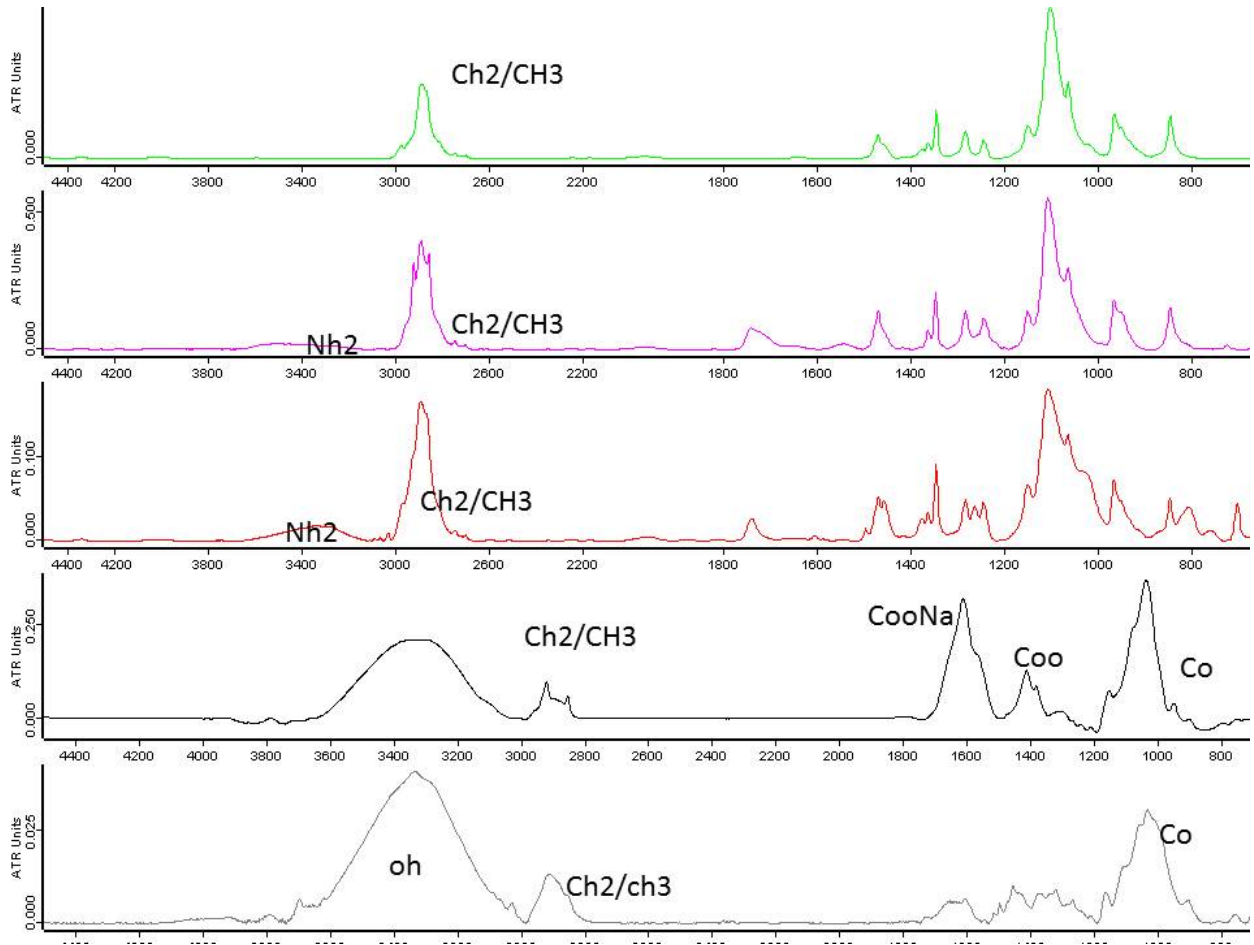

# 3-D scores for CS1/CS 4 Samples

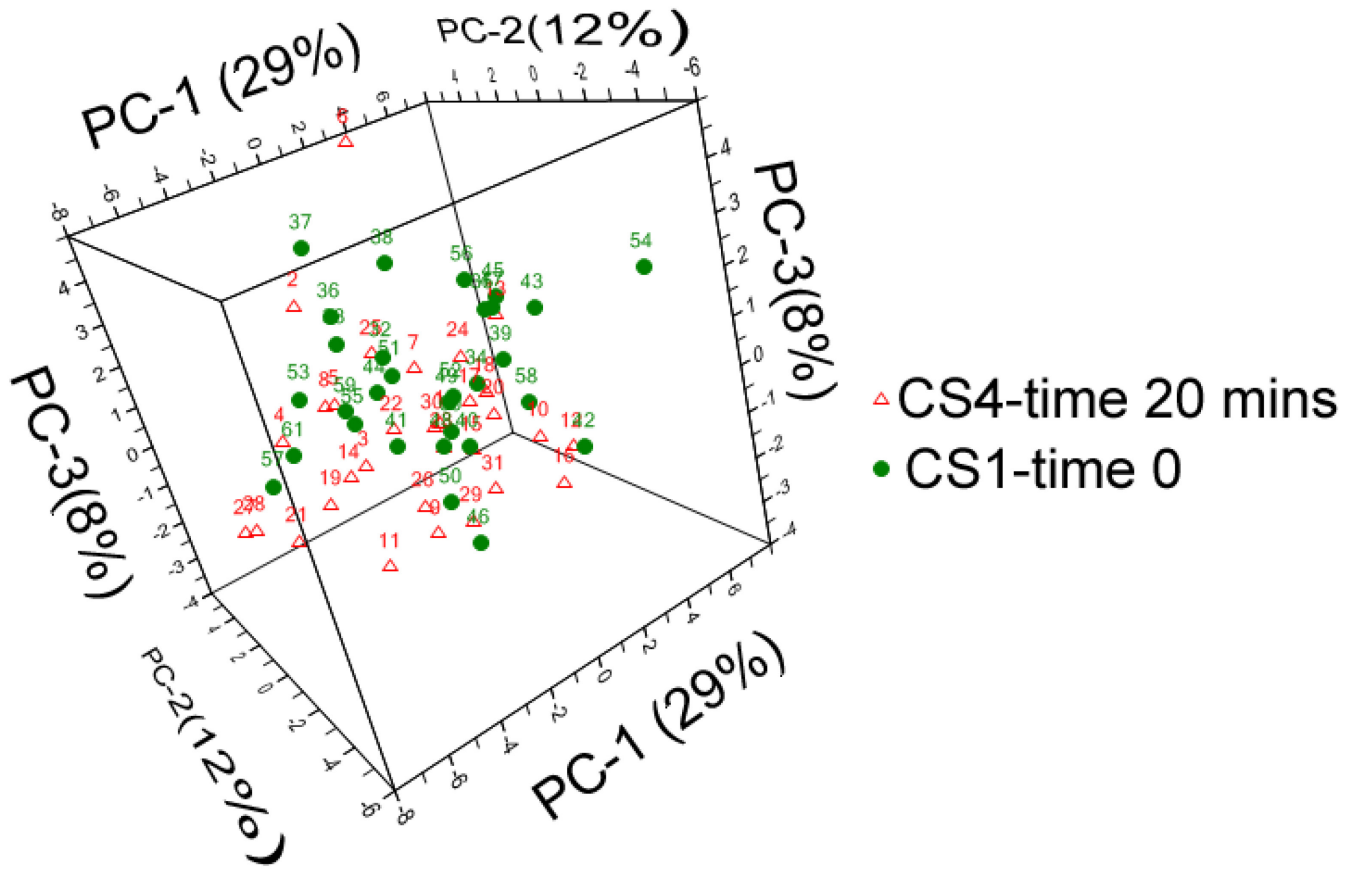

Enlarged Figure 1

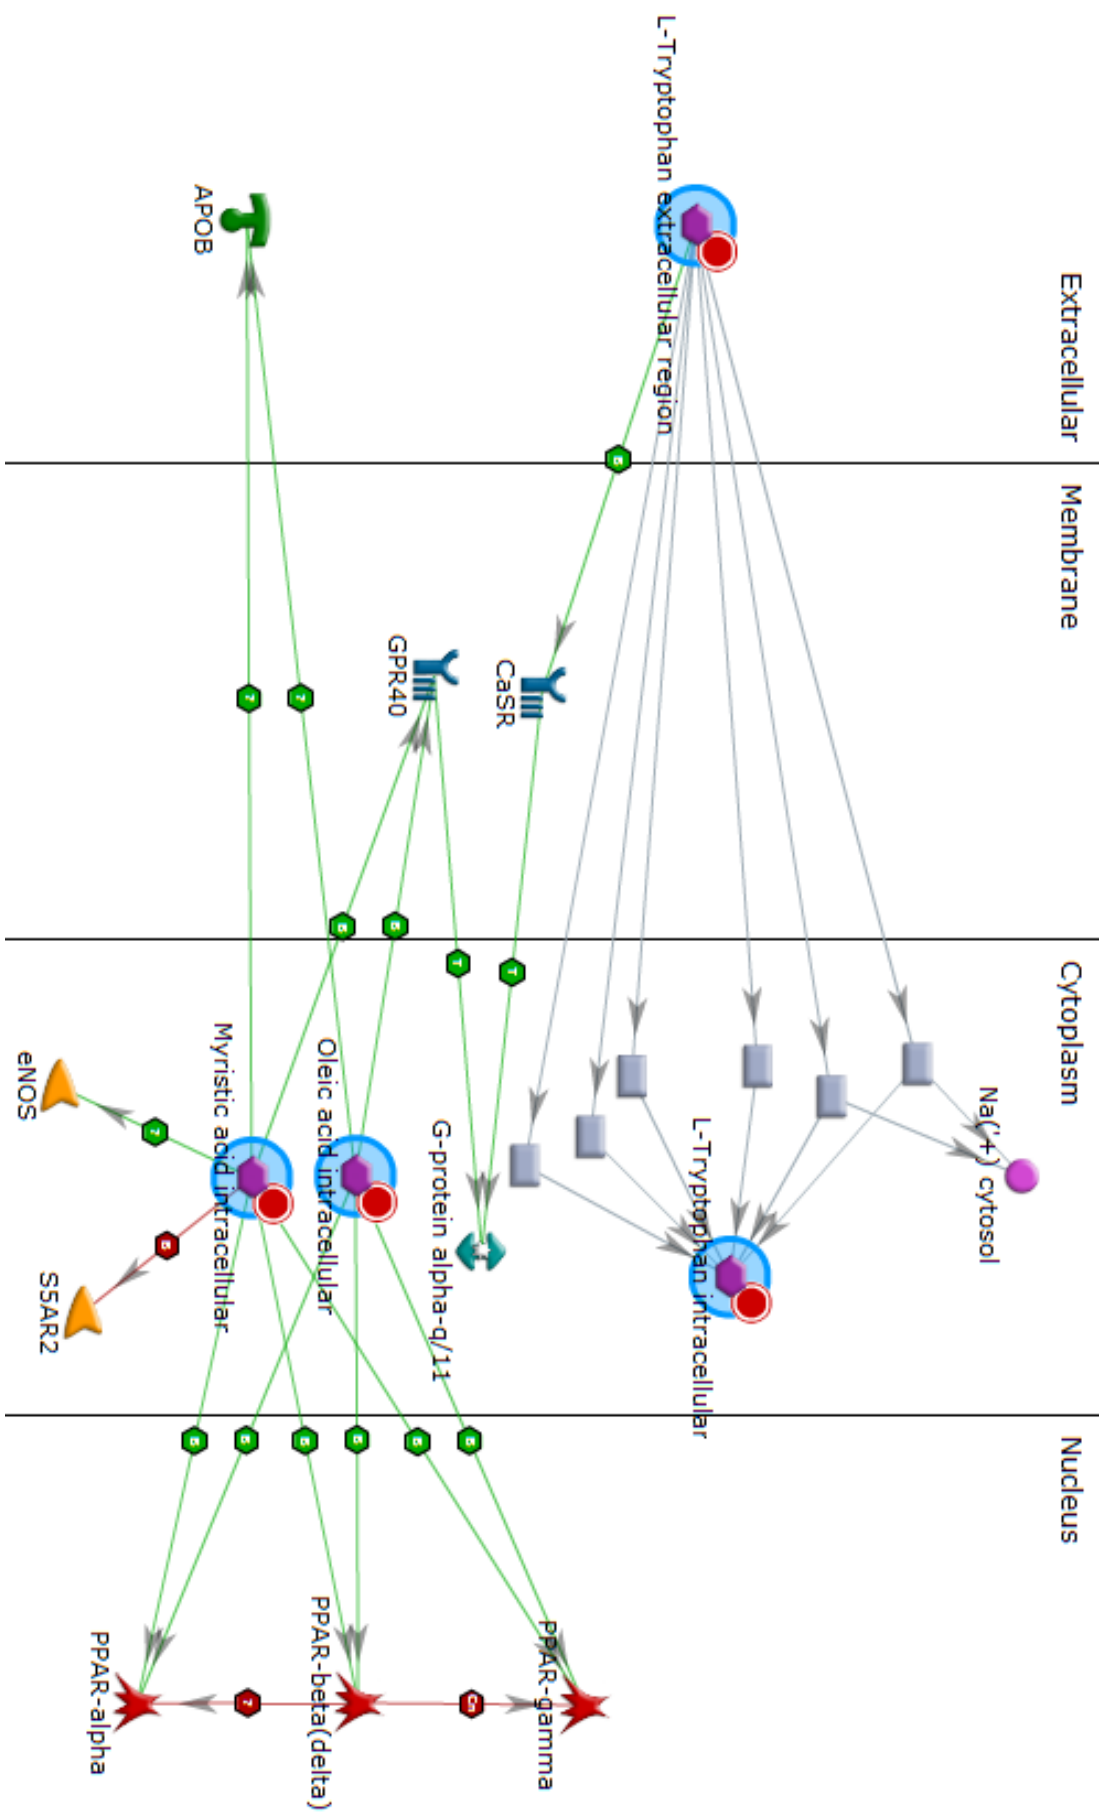

Enlarged Figure 2.

| Enzymes                                                                             |                           | Generic classes                                                                       |                                          |
|-------------------------------------------------------------------------------------|---------------------------|---------------------------------------------------------------------------------------|------------------------------------------|
|    | Generic enzyme            |    | Receptor ligand                          |
| KINASE                                                                              |                           | PHOSPHATASE                                                                           |                                          |
|    | Generic kinase            |      | Generic phosphatase                      |
|    | Protein kinase            |      | Protein phosphatase                      |
|    | Lipid kinase              |      | Lipid phosphatase                        |
| PHOSPHOLIPASE                                                                       |                           |                                                                                       |                                          |
|    | Generic phospholipase     |                                                                                       |                                          |
| PROTEASE                                                                            |                           | GTPase                                                                                |                                          |
|    | Generic protease          |      | G-alpha                                  |
|   | Metalloprotease           |     | RAS - superfamily                        |
| Channels/Transporters                                                               |                           | Receptors                                                                             |                                          |
|  | Generic channel           |    | Generic receptor                         |
|  | Ligand-gated ion channel  |    | GPCR                                     |
|  | Voltage-gated ion channel |    | Receptors with enzyme activity           |
|                                                                                     |                           | G protein adaptor/regulators                                                          |                                          |
|                                                                                     |                           |  | G beta/gamma                             |
|                                                                                     |                           |    | Reaction                                 |
|                                                                                     |                           |    | Transcription factor                     |
|                                                                                     |                           |    | Protein                                  |
|                                                                                     |                           |    | Cell membrane glycoprotein               |
|                                                                                     |                           |    | Compound                                 |
|                                                                                     |                           |    | Predicted metabolite or user's structure |
|                                                                                     |                           |    | Inorganic ion                            |
|                                                                                     |                           |   | DNA                                      |
|                                                                                     |                           |  | RNA                                      |
|                                                                                     |                           |  | Generic binding protein                  |

Enlarged Figure 2 legend.
